# Supplementary material for: Hydrogen-atom attack on phenol and toluene is ortho-directed
Source: Royal Society of Chemistry journal article supplement (doi:10.1039/c5cp07619f), 2016-01-01
Supplement: c5cp07619f1.pdf [file c5cp07619f1.pdf]

# Hydrogen-atom attack on phenol and toluene is ortho-directed.

## Supplementary Material

Olha Krechkivska,<sup>a</sup> Callan M. Wilcox,<sup>a</sup> Tyler Troy,<sup>b</sup> Klaas Nauta,<sup>a</sup> Bun Chan,<sup>b</sup>  
Rebecca Jacob,<sup>b</sup> Scott A. Reid,<sup>c</sup> Leo Radom,<sup>b</sup> Timothy W. Schmidt,<sup>a</sup> and Scott. H.  
Kable<sup>a</sup>

*a) School of Chemistry, University of New South Wales, Kensington, NSW, 2052,  
Australia*

*b) School of Chemistry, University of Sydney, Sydney, NSW, 2006, Australia*

*c) Department of Chemistry, Marquette University, Milwaukee, WI, 53201,  
USA.*

## Table of Contents

### **1 Experimental Results**

1.1 Lifetime Scan

### **2 Computational Results**

2.1 Cyclohexadienyl Radical

2.2 Substituted Cyclohexadienyl Radicals

# 1 Experimental Results

## 1.1 Lifetime Scan

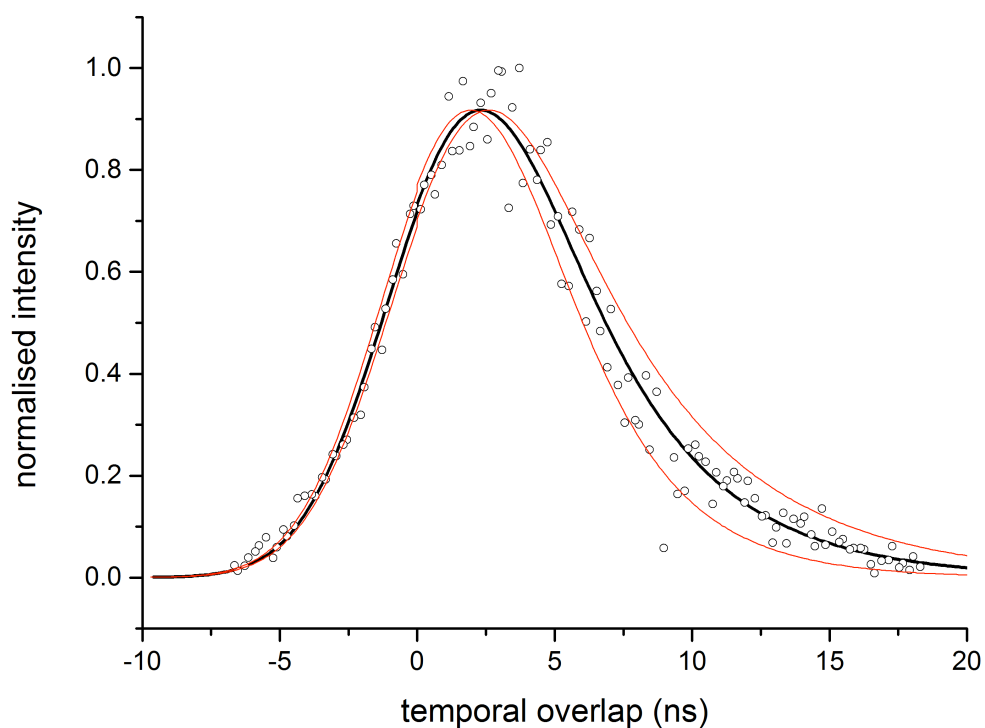

**Figure S1: Lifetime scan of the lowest energy hydroxyl-CHD isomer.** The data was fitted to the convolution of a Gaussian and a decaying exponential. The decay profile reveals a lifetime of  $4 \pm 1$  ns. The data were obtained by fixing the excitation laser and temporally scanning the ionization laser.

## 2 Computational Results

### 2.1 Cyclohexadienyl Radical

**Table S1. Ionization Energies (IE, eV) of Cyclohexadienyl Radical**

| Level of theory          | IE       |
|--------------------------|----------|
| B3-LYP/6-31G(2df,p)      | 6.45     |
| B3-LYP/6-311++G(3df,3pd) | 6.69     |
| G3X(MP2)-RAD             | 6.86     |
| G4(MP2)-6X               | 6.85     |
| W1X-1 vibrationless      | 6.79     |
| Botschwina vibrationless | 6.75     |
| W1X-1 0 K                | 6.84     |
| Botschwina 0 K           | 6.803(5) |

Geometries optimized at B3-LYP/6-31G(2df,p)

**Table S2. C-H Bond Dissociation Energies (BDE, kJ mol<sup>-1</sup>) for Cyclohexadienyl Radical**

| Level of theory          | BDE        |
|--------------------------|------------|
| B3-LYP/6-31G(2df,p)      | 118.8      |
| B3-LYP/6-311++G(3df,3pd) | 114.2      |
| G3X(MP2)-RAD             | 109.8      |
| G4(MP2)-6X               | 107.3      |
| W1X-1 vibrationless      | 109.6      |
| Botschwina vibrationless | 107 ± 1.0  |
| G4(MP2)-6X 0 K           | 85         |
| W1X-1 0 K                | 88.1       |
| Botschwina 0 K           | 85.7 ± 2.0 |
| G4(MP2)-6X 298 K         | 90         |
| W1X-1 298 K              | 92.7       |
| Botschwina 298 K         | 89.2       |

Geometries optimized at B3-LYP/6-31G(2df,p)

**Table S3. Proton Affinities (PA, kJ mol<sup>-1</sup>) for Benzene**

| Level of theory          | PA    |
|--------------------------|-------|
| B3-LYP/6-31G(2df,p)      | 810.3 |
| B3-LYP/6-311++G(3df,3pd) | 787.7 |
| G3X(MP2)-RAD             | 765.4 |
| G4(MP2)-6X               | 765.7 |
| W1X-1 vibrationless      | 767.6 |
| G4(MP2)-6X 0 K           | 740   |
| W1X-1 0 K                | 741.7 |
| G4(MP2)-6X 298 K         | 744   |
| W1X-1 298 K              | 746.3 |
| Experimental 298 K       | 748.4 |

Geometries optimized at B3-LYP/6-31G(2df,p)

**Table S4. Dissociation Energies (kJ mol<sup>-1</sup>) for C<sub>6</sub>H<sub>7</sub><sup>+</sup> → C<sub>6</sub>H<sub>6</sub><sup>+</sup> + H**

| Level of theory         | DE    |
|-------------------------|-------|
| UB3LYP/6-31G(2df,p)     | 352.1 |
| B3LYP/6-311++G(3df,3pd) | 350.6 |
| G3X(MP2)-RAD            | 354.8 |
| G4(MP2)6X               | 352.6 |
| W1X-1 vibrationless     | 355.5 |
| W1X-1 0 K               | 322.9 |
| G4(MP2)-6X 0 K          | 322   |
| W1X-1 298 K             | 329.6 |
| G4(MP2)-6X 298 K        | 328   |
| Expt (298 K)            | 328.2 |

**Table S5. Barriers (kJ mol<sup>-1</sup>) for a Degenerate 1,2-Shift in Cyclohexadienyl Radical**

| Level of theory          | Barrier |
|--------------------------|---------|
| B3-LYP/6-31G(2df,p)      | 210.1   |
| B3-LYP/6-311++G(3df,3pd) | 205.1   |
| G3X(MP2)-RAD             | 208.3   |
| G4(MP2)-6X               | 199.4   |
| W1X-1                    | 205.7   |
| W1X-1 0 K                | 193.4   |
| W1X-1 298 K              | 193.3   |

Geometries optimized at B3-LYP/6-31G(2df,p)

**Table S6. Barriers (kJ mol<sup>-1</sup>) for a Degenerate 1,2-Shift in Cyclohexadienyl Cation**

| Level of theory          | Barrier |
|--------------------------|---------|
| B3-LYP/6-31G(2df,p)      | 51.1    |
| B3-LYP/6-311++G(3df,3pd) | 51.0    |
| G3X(MP2)-RAD             | 40.8    |
| G4(MP2)6X                | 38.6    |
| W1X-1                    | 39.8    |
| W1X-1 0 K                | 34.3    |
| W1X-1 298 K              | 32.9    |

Geometries optimized at B3-LYP/6-31G(2df,p)

## 2.2 Substituted Cyclohexadienyl Radicals

**Table S7. Relative Energies (kJ mol<sup>-1</sup>) for Isomers of Substituted Cyclohexadienyl Radicals**

| Species        | Level of theory          | ortho | meta | para | ipso |
|----------------|--------------------------|-------|------|------|------|
| <b>Methyl-</b> | B3-LYP/6-31G(2df,p)      | 0.0   | 6.1  | 5.4  | 17.2 |
|                | B3-LYP/6-311++G(3df,3pd) | 0.0   | 6.1  | 6.1  | 14.7 |
|                | G3X(MP2)-RAD             | 0.0   | 5.0  | 6.6  | 10.2 |
|                | G4(MP2)-6X               | 0.0   | 5.4  | 6.5  | 10.5 |
|                |                          |       |      |      |      |
| <b>OH-</b>     | B3-LYP/6-31G(2df,p)      | 0.0   | 13.0 | 11.4 | 45.0 |
|                | B3-LYP/6-311++G(3df,3pd) | 0.0   | 13.1 | 12.6 | 37.8 |
|                | G3X(MP2)-RAD             | 0.0   | 12.2 | 13.2 | 31.9 |
|                | G4(MP2)-6X               | 0.0   | 13.5 | 13.1 | 32.0 |

Geometries optimized at B3-LYP/6-31G(2df,p)

**Table S8. Relative Energies (kJ mol<sup>-1</sup>) for Isomers of Substituted Cyclohexadienyl Cations**

| Species        | Level of theory          | ortho | meta | para | ipso  |
|----------------|--------------------------|-------|------|------|-------|
| <b>Methyl-</b> | B3-LYP/6-31G(2df,p)      | 5.5   | 20.9 | 0.0  | 39.2  |
|                | B3-LYP/6-311++G(3df,3pd) | 5.7   | 21.7 | 0.0  | 38.8  |
|                | G3X(MP2)-RAD             | 6.3   | 19.7 | 0.0  | 34.3  |
|                | G4(MP2)-6X               | 5.9   | 19.7 | 0.0  | 33.7  |
|                |                          |       |      |      |       |
| <b>OH-</b>     | B3-LYP/6-31G(2df,p)      | 11.5  | 70.4 | 0.0  | 131.0 |
|                | B3-LYP/6-311++G(3df,3pd) | 11.5  | 68.2 | 0.0  | 124.6 |
|                | G3X(MP2)-RAD             | 14.6  | 72.5 | 0.0  | 123.6 |
|                | G4(MP2)-6X               | 14.4  | 73.3 | 0.0  | 123.7 |

Geometries optimized at B3-LYP/6-31G(2df,p)

**Table S9. Ionization Energies (eV) for Isomers of Substituted Cyclohexadienyl Radicals**

| Species                            | Level of theory          | ortho | meta | para | ipso |
|------------------------------------|--------------------------|-------|------|------|------|
| <b>Methyl-</b>                     | B3-LYP/6-31G(2df,p)      | 6.21  | 6.31 | 6.10 | 6.38 |
|                                    | B3-LYP/6-311++G(3df,3pd) | 6.44  | 6.54 | 6.32 | 6.63 |
|                                    | G3X(MP2)-RAD             | 6.63  | 6.72 | 6.50 | 6.82 |
|                                    | G4(MP2)-6X               | 6.63  | 6.72 | 6.50 | 6.81 |
| Both<br>G3X(MP2)-RAD<br>G4(MP2)-6X | vibrationless            | 6.63  | 6.72 | 6.50 | 6.82 |
|                                    | 0 K                      | 6.67  | 6.76 | 6.54 | 6.85 |
|                                    | 298 K                    | 6.68  |      |      |      |
|                                    | 0K, empirical correction | 6.59  | 6.68 | 6.42 | 6.77 |
| <b>OH-</b>                         | B3-LYP/6-31G(2df,p)      | 5.95  | 6.43 | 5.72 | 6.73 |
|                                    | B3-LYP/6-311++G(3df,3pd) | 6.26  | 6.71 | 6.01 | 7.04 |
|                                    | G3X(MP2)-RAD             | 6.40  | 6.87 | 6.11 | 7.20 |
|                                    | G4(MP2)-6X               | 6.39  | 6.86 | 6.11 | 7.19 |
| G3X(MP2)-RAD                       | vibrationless            | 6.40  | 6.87 | 6.11 | 7.2  |
|                                    | 0 K                      | 6.47  | 6.94 | 6.19 | 7.27 |
|                                    | 298 K                    | 6.46  |      |      |      |
|                                    | 0K, empirical correction | 6.39  | 6.86 | 6.11 | 7.19 |

Geometries optimized at B3-LYP/6-31G(2df,p)

**Table S10. C-H Bond Dissociation Energies (BDE, kJ mol<sup>-1</sup>) for Isomers of Substituted Cyclohexadienyl Radicals**

| Species        | Level of theory          | ortho | meta  | para  | ipso  |
|----------------|--------------------------|-------|-------|-------|-------|
| <b>Methyl-</b> | B3-LYP/6-31G(2df,p)      | 126.1 | 119.9 | 120.7 | 108.8 |
|                | B3-LYP/6-311++G(3df,3pd) | 121.6 | 115.5 | 115.5 | 106.9 |
|                | G3X(MP2)-RAD             | 116.4 | 111.4 | 109.8 | 106.2 |
|                | G4(MP2)-6X               | 115.2 | 109.8 | 108.7 | 104.7 |
| G4(MP2)-6X     | 0 K                      | 92.6  | 87.9  | 87.1  | 81.0  |
|                | 298 K                    | 97.8  | 92.8  | 91.5  | 86.5  |
| <b>OH-</b>     | B3-LYP/6-31G(2df,p)      | 129.3 | 116.2 | 117.9 | 84.3  |
|                | B3-LYP/6-311++G(3df,3pd) | 125.8 | 112.7 | 113.2 | 88.0  |
|                | G3X(MP2)-RAD             | 120.3 | 108.1 | 107.2 | 88.5  |
|                | G4(MP2)-6X               | 119.4 | 105.9 | 106.4 | 87.4  |
| G4(MP2)-6X     | 0 K                      | 96.6  | 85.0  | 84.7  | 65.8  |
|                | 298 K                    | 101.2 | 89.2  | 88.9  | 69.8  |

**Table S11. Proton Affinities (PA, kJ mol<sup>-1</sup>) for Phenol**

| Level of theory          | ortho                              | meta  | para  | ipso  |
|--------------------------|------------------------------------|-------|-------|-------|
| B3-LYP/6-31G(2df,p)      | 868.2                              | 809.3 | 879.7 | 748.7 |
| B3-LYP/6-311++G(3df,3pd) | 840.9                              | 784.2 | 852.4 | 727.7 |
| G3X(MP2)-RAD             | 820.5                              | 762.7 | 835.1 | 711.5 |
| G4(MP2)-6X               | 821.6                              | 762.7 | 836.0 | 712.3 |
| W1X-1 vibrationless      | 821.7                              | 763.3 | 836.3 |       |
| W1X-1 0 K                | 792.2                              | 738.2 | 806.4 |       |
| W1X-1 298 K              | 797.3                              | 742.8 | 811.8 |       |
| Expt                     | 817.3                              |       |       |       |
| Benzene                  | 750.4 (expt), 746.3 (W1X-1, 298 K) |       |       |       |

**Table S12. Proton Affinities (PA, kJ mol<sup>-1</sup>) for Toluene**

| Level of theory          | ortho                              | meta  | para  | ipso  |
|--------------------------|------------------------------------|-------|-------|-------|
| B3-LYP/6-31G(2df,p)      | 840.2                              | 824.8 | 845.7 | 806.6 |
| B3-LYP/6-311++G(3df,3pd) | 818.9                              | 803.0 | 824.7 | 785.9 |
| G3X(MP2)-RAD             | 794.0                              | 780.6 | 800.3 | 765.9 |
| G4(MP2)-6X               | 794.4                              | 780.6 | 800.3 | 766.6 |
| W1X-1 vibrationless      | 796.7                              | 782.2 | 802.8 |       |
| W1X-1 0 K                | 770.3                              | 756.0 | 776.8 |       |
| W1X-1 298 K              | 775.0                              | 760.9 | 781.5 |       |
| Expt                     | 784.0                              |       |       |       |
| Benzene                  | 750.4 (expt), 746.3 (W1X-1, 298 K) |       |       |       |

**Table S13. Barriers (kJ mol<sup>-1</sup>) for a Degenerate 1,2-Shift in Isomers of Substituted Cyclohexadienyl Radical**

| Species        | Level of theory          | Relative energies |      |      |      | 1-2 shift TS energies with respect to ortho |               |              |
|----------------|--------------------------|-------------------|------|------|------|---------------------------------------------|---------------|--------------|
|                |                          | ortho             | meta | para | ipso | Ortho to ipso                               | Ortho to meta | Meta to para |
| <b>Methyl-</b> | B3-LYP/6-31G(2df,p)      | 0.0               | 6.1  | 5.4  | 17.2 | 218.1                                       | 212.2         | 213.5        |
|                | B3-LYP/6-311++G(3df,3pd) | 0.0               | 6.1  | 6.1  | 14.7 | 212.0                                       | 206.7         | 208.7        |
|                | G3X(MP2)-RAD             | 0.0               | 5.0  | 6.6  | 10.2 | 213.8                                       | 208.9         | 211.3        |
|                | G4(MP2)-6X               | 0.0               | 5.4  | 6.5  | 10.5 | 205.5                                       | 200.9         | 203.3        |
| <b>OH-</b>     | B3-LYP/6-31G(2df,p)      | 0.0               | 13.0 | 11.4 | 45.0 | 248.8                                       | 215.0         | 224.6        |
|                | B3-LYP/6-311++G(3df,3pd) | 0.0               | 13.1 | 12.6 | 37.8 | 240.0                                       | 210.7         | 219.1        |
|                | G3X(MP2)-RAD             | 0.0               | 12.2 | 13.2 | 31.9 | 240.9                                       | 214.4         | 222.6        |
|                | G4(MP2)-6X               | 0.0               | 13.5 | 13.1 | 32.0 |                                             | 207.7         | 215.6        |

**Table S14. Barriers (kJ mol<sup>-1</sup>) for a Degenerate 1,2-Shift in Isomers of Substituted Cyclohexadienyl Cation**

| Species        | Level of theory          |       |      |      |       | 1-2 shift TS  |               |              |
|----------------|--------------------------|-------|------|------|-------|---------------|---------------|--------------|
|                |                          | ortho | meta | para | ipso  | Ortho to ipso | Ortho to meta | Meta to para |
| <b>Methyl-</b> | B3-LYP/6-31G(2df,p)      | 5.5   | 20.9 | 0.0  | 39.2  | 16.4          | 16.4          | 16.0         |
|                | B3-LYP/6-311++G(3df,3pd) | 5.7   | 21.7 | 0.0  | 38.8  | 16.4          | 16.5          | 16.1         |
|                | G3X(MP2)-RAD             | 6.3   | 19.7 | 0.0  | 34.3  | 13.4          | 14.0          | 13.6         |
|                | G4(MP2)-6X               | 5.9   | 19.7 | 0.0  | 33.7  | 12.9          | 13.4          | 13.1         |
| <b>OH-</b>     | B3-LYP/6-31G(2df,p)      | 11.5  | 70.4 | 0.0  | 131.0 | 135.1         | 107.7         | 100.7        |
|                | B3-LYP/6-311++G(3df,3pd) | 11.5  | 68.2 | 0.0  | 124.6 | 129.3         | 106.0         | 98.9         |
|                | G3X(MP2)-RAD             | 14.6  | 72.5 | 0.0  | 123.6 | 128.0         | 103.6         | 96.4         |
|                | G4(MP2)-6X               | 14.4  | 73.3 | 0.0  | 123.7 | 128.1         | 102.2         | 95.0         |
